# Supplementary material for: Characterization of Antimicrobial Resistance Determinants and Class 1 and Class 2 Integrons in Salmonella enterica spp., Multidrug-Resistant Isolates from Pigs
Source: Genes (Basel). 2018 May 16;9(5):256. doi: 10.3390/genes9050256 (PMC5977196; doi:10.3390/genes9050256)
Supplement: Supplementary file 1 [file genes-09-00256-s001.xlsx]

## Sheet: Table S1
Table S1: Primers used to amplify the target genes in this study.
Antimicrobial resistance determinant	Forward (F) and reverse (R) Primers 5'-3'	Reference	Amplicon size (bp)	Anealing temperature (ºC)
class 1 integron U12338	F-GGCATCCAAGCAGCAAG / R-AAGCAGACTTGACCTGA	Lévesque et al. , 1995 (13)	variable	58
class 2 integron AJ002782 (22) variable 65 03:00	F-CGGGATCCCGGACGGCATGCACGATTTGTA /R- GATGCCATCGCAAGTACGAG	White et al. , 2001	variable	65
integrase1	F-GCCTTGCTGTTCTTCTAC / R-GATGCCTGCTTGTTCTAC	Ng et al., 1999	558	55
qacEΔ1	F-ATCGCAATAGTTGGCGAAGT / R-CAAGCTTTTGCCCATGAAGC	Sandvang et al. , 1997	226	60
sul1	F-CTTCGATGAGAGCCGGCGGC / R-GCAAGGCGGAAACCCGCGCC	Sandvang et. al ., 1997	436	65
sul2	F-TCAACATAACCTCGGACAGT / R-GATGAAGTCAGCTCCACCT	Chu et al. , 2001	707	58
sul3	F- GAGCAAGATTTTTGGAATCG /R- CATCTGCAGCTAACCTAGGGCTTTGGA	Perreten & Boerlin, 2003	789	51
bla TEM-1	F-TTGGGTGCACGAGTGGGT / R-TAATTGTTGCCGGGAAGC	Guerra et al ., 2001	503	55
bla PSE-1	F-CGCTTCCCGTTAACAAGTAC / R-CTGGTTCATTTCAGATAGCG	Sandvang et al. , 1997	419	65
bla OXA-1-like	F-AGCAGCGCCAGTGCATCA /R- ATTCGACCCCAAGTTTCC	Guerra et al ., 2000	708	59
aac(3)-II	F-ATTCGAAAACTCGGAGTC / R-CGGAGTGGCTCCGAAGTG	Beutlich et al., 2011	800	55
aac(3)-IV	F-GTTACACCGGACCTTGGA / R-AACGGCATTGAGCGTCAG	Guerra et al ., 2001	674	60
aadB	F-GAGCGAAATCTGCCGCTCTGG / R-CTGTTACAACGGACTGGCCGC	Frana et al ., 2001	350	70
aadA1 -like	F-GTGGATGGCGGCCTGAAGCC / R-ATTGCCCAGTCGGCAGCG	Sandvang et al. , 1997	523	60
aadA2	F-TGT TGG TTA CTG TGG CCG TA / R-GAT CTC GCC TTT CAC AAA GC	Walker et al ., 2001	622	66
aphA1	F-AAACGTCTTGCTCGAGGC / R-CAAACCGTTATTCATTCGTGA	Frana et al. , 2001	461	60
aphA2	F-ACTGGCTGCTATTGGGCGA / R-CGTCAAGAAGGCGATAGAAGG	Frana et al. , 2002	516	55
dfrA1- like	F-GTGAAACTATCACTAATGG / R-CCCTTTTGCCAGATTTGG	Guerra et al ., 2000	2000	60
dfrA12	F-ACTCGGAATCAGTACGCA / R-GTGTACGGAATTACAGCT	Guerra et al ., 2001	462	55
dfrA17	F-GATTTCTGCAGTGTCAGA /R- CTCAGGCATTATAGGGAA	Guerra et al ., 2004	384	55
dfrA5-14	F-GATTGGTTGCGGTCCA / R-CTCAAAAACAACTTCGAAGG	Frech et. al. , 2003	379	55
dfrA7-17	F-CAGAAAATGGCGTAATCG /R-TCACCTTCAACCTCAACG	Frech et. al. , 2003	345	60
catA1	F-CCACCGTTGATATATCCC / R-CCTGCCACTCATCGCAGT	Guerra et al ., 2001	623	55
cmlA1	F-TGTCATTTACGGCATACTCG / R-ATCAGGCATCCCATTCCCAT	Guerra et al ., 2001	435	55
floR	F-CACGTTGAGCCTCTATAT / R-ATGCAGAAGTAGAACGCG	Ng et al., 1999	868	55
tetA	F-GCTACATCCTGCTTGCCT / R-CATAGATCGCCGTGAAGA	Ng et al., 1999	210	55
tetG	F-GCTCGGTGGTATCTCTGC / R-AGCAACAGAATCGGGAAC	Ng et al., 1999	500	55
tetB	F-TTGGTTAGGGGCAAGTTTTG / R-GTAATGGGCCAATAACACCG	Ng et al., 1999	600	55
qnrB	F-ATGACGCCATTACTGTATAA / R-GATCGCAATGTGTGAAGTTT	Jacoby et al ., 2006	560	55
qnrS	F-ACGACATTCGTCAACTGCAA / R-TAAATTGGCACCCTGTAGGC	Gay et al ., 2006	417	60
qnrC	F-GGGTTGTACATTTATTGAATC / R-TCCACTTTACGAGGTTCT	Wang et al ., 2009	447	50
qnrD	F-CGAGATCAATTTACGGGGAATA / R-AACAAGCTGAAGCGCCTG	Cavaco et al ., 2009	582	55
gyrA	F-TGTCCGAGATGGCCTGAAGC / R-TACCGTCATAGTTATCCACG	Guerra et al., 2003	346	60

## Sheet: Table S2
Table S2: 62 Salmonella spp-. strains included in the study, the antimicrobial resistance profile and genetic determinants conferring the resistance.
Reference	Serotype	Reistance_profile	qac	sul1	sul2	sul3	blaTEM1-like	blaoxa1-like	Blapse-1	tetA	tetB	tetG	catA1	cmlA	floR	aadA1-like	aadA2	dfrA1-like	dfrA17	dfrA12	dfrA7-17	dfrA5-14	aphAI-IAB	aphA2	acc(3)-IV	acc(3)-II	aadB
SH 1	Rissen	AMP-CEP-CHL-SMX-SPE-STR-TET-TMP	qac	sul1					blaPSE-1	tetA					flor	aadA1-like
SH 2	monophasic_Typhimurium	AMP-SMX-TMP	qac	sul1					blaPSE-1													dfrA5-14
SH 4	Typhimurium	SMX-SPE-STR-TET-TMP	qac	sul1						tetA						aadA1-like	aadA2			dfrA12
SH 5	Typhimurium	AMP-CEP-COL-GEN-SMX-SPE-STR-TET-TMP	qac	sul1		sul3	blaTEM1-like			tetA						aadA1-like		dfrA1-like				dfrA5-14			aac(3)-IV
SH 6	Typhimurium	AMP-APR-CEP-GEN-SMX-SPE-STR-TET			sul2		blaTEM1-like			tetA						aadA1-like									aac(3)-IV
SH 7	Typhimurium	AMP-APR-CHL-FFN-GEN-SMX-SPE-STR-TET-TMP	qac	sul1			blaTEM1-like			tetA					flor					dfrA12					aac(3)-IV
SH 8	Typhimurium	AMP-CHL-CEP-GEN-SPE-SMX-SPE-STR-TET-TMP	qac	sul1	sul2	sul3	blaTEM1-like			tetA				cmlA		aadA1-like	aadA2			dfrA12					aac(3)-IV
SH 9	Typhimurium	AMP-APR-CEP-CHL-GEN-SMX-SPE-STR-TET-TMP	qac	sul1	sul2	sul3	blaTEM1-like			tetA				cmlA		aadA1-like	aadA2			dfrA12					aac(3)-IV	aac(3)-II
SH 10	Typhimurium	AMP-APR-CEP-CHL-CIP-FFN-GEN-NAL-NEO-SMX-SPE-STR-TET-TMP	qac	sul1		sul3	blaTEM1-like			tetA		tetG		cmlA		aadA1-like	aadA2			dfrA12					aac(3)-IV
SH 12	monophasic_Typhimurium	AMP-APR-CEP-GEN-SMX-SPE-STR-TET-TMP	qac	sul1	sul2		blaTEM1-like			tetA						aadA1-like	aadA2			dfrA12					aac(3)-IV
SH 13	monophasic_Typhimurium	AMP-APR-CEP-CHL-GEN-SMX-SPE-STR-TET-TMP	qac	sul1	sul2		blaTEM1-like			tetA				cmlA		aadA1-like	aadA2			dfrA12					aac(3)-IV
SH 14	Derby	APR-CHL-FFN-GEN-SMX-SPE-STR-TET	qac	sul1						tetA					flor	aadA1-like	aadA2								aac(3)-IV
SH 16	monophasic_Typhimurium	AMP-APR-CEP-CIP-CHL-FFN-GEN-NAL-SMX-SPE-STR-TET-TMP-XLN	qac	sul1		sul3	blaTEM1-like			tetA					flor		aadA2	dfrA1-like		dfrA12					aac(3)-IV
SH 17	Bredeney	CHL-CIP-FFN-NAL-SMX-SPE-STR-TET-TMP				sul3				tetA					flor	aadA1-like	aadA2	dfrA1-like
SH 18	Rissen	AMP-CHL-GEN-KAN-SMX-SPE-STR-TET-TMP	qac	sul1		sul3	blaTEM1-like	blaOXA-1-like		tetA				cmlA		aadA1-like				dfrA12			aphA1		aac(3)-IV
SH 19	Wien	AMP-CEP-CHL-CIP-NAL-NEO-SMX-SPE-STR-TMP	qac	sul1		sul3	blaTEM1-like							cmlA		aadA1-like		dfrA1-like
SH 22	Worthington	AMP-CEP-CIP-SMX-SPE-STR-TET-TMP-XLN	qac	sul1						tetA						aadA1-like			dfrA17
SH 23	monophasic_Typhimurium	CHL-CIP-NAL-SMX-SPE-STR-TET-TMP	qac	sul1		sul3				tetA			catA1	cmlA		aadA1-like	aadA2			dfrA12
SH 24	Typhimurium	SPE-SMX-TET			sul2						tetB
SH 25	Typhimurium	AMP-CHL-SMX-SPE-STR-TET	qac	sul1	sul2		blaTEM1-like	blaOXA-1-like			tetB		catA1			aadA1-like
SH 26	Typhimurium	AMP-CHL-CIP-NAL-SMX-SPE-STR-TET	qac	sul1	sul2		blaTEM1-like	blaOXA-1-like			tetB		catA1	cmlA		aadA1-like
SH 27	Typhimurium	AMP-CHL-CIP-NAL-SMX-SPE-STR-TET	qac	sul1				blaOXA-1-like			tetB					aadA1-like
SH 28	Typhimurium	AMP-CHL-CIP-FFN-NEO-SMX-SPE-STR-TET-TMP	qac	sul1	sul2		blaTEM1-like			tetA				cmlA		aadA1-like	aadA2					dfrA5-14
SH 29	Typhimurium	AMP-CHL-CIP-FFN-FOT-NAL-NEO-SPE-STR-TET					blaTEM1-like				tetB				flor		aadA2
SH 30	Typhimurium	CHL-CIP-FFN-GEN-NAL-SMX	qac	sul1		sul3							catA1	cmlA											aac(3)-IV
SH 31	Typhimurium	CHL-CIP-FFN-GEN-NAL-SMX-SPE-STR	qac	sul1									catA1	cmlA		aadA1-like	aadA2								aac(3)-IV
SH 32	London	AMP-CHL-FOT-GEN-KAN-SMX-SPE-STR-TET	qac	sul1			blaTEM1-like			tetA		tetG	catA1			aadA1-like							aphA1		aac(3)-IV
SH 33	Derby	AMP-FOT-NEO-SMX-SPE-STR-TET			sul2		blaTEM1-like			tetA	tetB
SH 34	Derby	FOT-SMX-SPE-STR-TET	qac	sul1						tetA						aadA1-like	aadA2
SH 35	Derby	FOT-SMX-SPE-STR-TET	qac	sul1						tetA						aadA1-like	aadA2
SH 36	Typhimurium	AMP-FOT-KAN-GEN-SPE-STR-TET					blaTEM1-like				tetB	tetG											aphA1		aac(3)-IV
SH 37	Derby	AMP-FOT-NEO-SMX-SPE-STR-TMP	qac	sul1				blaOXA-1-like								aadA1-like	aadA2	dfrA1-like
SH 40	Typhimurium	AMP-CHL-NEO-SPE-STR-TET					blaTEM1-like			tetA			catA1			aadA1-like
SH 41	Typhimurium	AMP-CHL-CIP-FFN-FOT-NAL-SMX-SPE-STR-TET	qac	sul1		sul3			blaPSE-1		tetB	tetG			flor	aadA1-like	aadA2
SH 44	Rissen	AMP-FOT-SMX-SPE-STR-TET-TMP	qac	sul1	sul2		blaTEM1-like			tetA						aadA1-like		dfrA1-like
SH 45	Typhimurium	AMP-CHL-FFN-SMX-SPE-STR-TET	qac	sul1					blaPSE-1		tetB	tetG			flor	aadA1-like	aadA2
SH 46	Typhimurium	AMP-SPE-STR-TET					blaTEM1-like				tetB					aadA1-like	aadA2
SH 47	Typhimurium	AMP-SPE-STR-TET					blaTEM1-like				tetB
SH 48	Typhimurium	AMP-SPE-STR-TET					blaTEM1-like				tetB
SH 49	Typhimurium	AMP-CHL-FFN-SPE-STR-TET					blaTEM1-like				tetB				flor
SH 50	Bredeney	AMP-SMX-SPE-STR-TET-TMP	qac	sul1	sul2		blaTEM1-like									aadA1-like	aadA2	dfrA1-like
SH 51	Typhimurium	AMP-GEN-KAN-SMX-SPE-STR-TET-TMP	qac	sul1					blaPSE-1	tetA							aadA2					dfrA5-14	aphA1		aac(3)-IV
SH 52	Typhimurium	CHL-FFN-SMX-SPE-STR-TET-TMP			sul2	sul3				tetA				cmlA		aadA1-like	aadA2			dfrA12
SH 53	Typhimurium	CHL-FFN-SMX-SPE-STR-TET-TMP				sul3				tetA				cmlA		aadA1-like	aadA2			dfrA12
SH 54	Typhimurium	AMP-CHL-SMX-SPE-STR-TET	qac	sul1					blaPSE-1		tetB	tetG			flor	aadA1-like	aadA2
SH 56	Typhimurium	AMP-SPE-STR-TET					blaTEM1-like			tetA
SH 57	Typhimurium	AMP-CHL-FFN-SMX-SPE-STR-TET	qac	sul1					blaPSE-1			tetG			flor	aadA1-like	aadA2
SH 58	Typhimurium	AMP-CHL-FFN-SMX-SPE-STR-TET	qac	sul1					blaPSE-1			tetG			flor	aadA1-like	aadA2
SH 59	Typhimurium	AMP-CHL-FFN-SMX-SPE-STR-TET	qac	sul1					blaPSE-1			tetG			flor	aadA1-like	aadA2
SH 60	Typhimurium	AMP-CHL-FFN-SMX-SPE-STR-TET	qac	sul1					blaPSE-1			tetG			flor	aadA1-like	aadA2
SH 61	Typhimurium	AMP-CHL-FFN-SMX-SPE-STR-TET	qac	sul1					blaPSE-1			tetG			flor	aadA1-like	aadA2
SH 62	Typhimurium	AMP-CHL-FFN-SMX-SPE-STR-TET-TMP				sul3	blaTEM1-like			tetA			catA1	cmlA		aadA1-like	aadA2			dfrA12
SH 63	Typhimurium	CHL-FFN-SMX-SPE-STR-TET-TMP			sul2	sul3				tetA			catA1	cmlA		aadA1-like	aadA2			dfrA12
SH 64	Typhimurium	AMP-SMX-SPE-STR-TMP	qac			sul3	blaTEM1-like		blaPSE-1							aadA1-like	aadA2			dfrA12
SH 65	Typhimurium	AMP-SPE-STR-TET-TMP					blaTEM1-like			tetA						aadA1-like		dfrA1-like
SH 66	Kapemba	AMP-CHL-NAL-SMX-SPE-STR-TET-TMP	qac	sul1			blaTEM1-like			tetA			catA1			aadA1-like	aadA2	dfrA1-like
SH 67	Typhimurium	AMP-CHL-FFN-NAL-SMX-SPE-STR-TET	qac	sul1					blaPSE-1			tetG			flor	aadA1-like	aadA2
SH 68	Typhimurium	CHL-SMX-SPE-STR-TET	qac	sul1						tetA			catA1	cmlA		aadA1-like
SH 69	Typhimurium	SMX-SPE-STR-TET	qac	sul1						tetA						aadA1-like	aadA2
SH 70	Typhimurium	SMX-SPE-STR-TET	qac	sul1						tetA						aadA1-like
SH 72	Typhimurium	AMP-SMX-SPE-STR				sul3	blaTEM1-like
SH 73	Typhimurium	AMP-CIP-FOT-NAL-SMX-SPE-STR	qac	sul1				blaOXA-1-like								aadA1-like
